# Supplementary material
Source: PubMed Central journal article supplement (PMC2685939)
Supplement: supp_136_5_715__8.pdf [file supp_136_5_715__8.pdf]

**Table S1. Average Ct values for neural determinants**

| Gene          | Ct in wild-type ES cells | Ct in E15 brain |
|---------------|--------------------------|-----------------|
| <i>Sox1</i>   | 24                       | 22              |
| <i>Math1</i>  | 30                       | 25              |
| <i>Mash1</i>  | 29                       | 21              |
| <i>Ngn1</i>   | 26                       | 23              |
| <i>Ngn2</i>   | 33                       | 22              |
| <i>Pax3</i>   | 33                       | 24              |
| <i>Pax6</i>   | 27                       | 23              |
| <i>Pax7</i>   | 33                       | 23              |
| <i>Msx1</i>   | 32                       | 25              |
| <i>Nkx2-2</i> | 29                       | 25              |
| <i>Calb</i>   | 30                       | 23              |
| <i>Syt4</i>   | 26                       | 21              |
| <i>Sox2*</i>  | 18                       | 21              |
| <i>Gapdh*</i> | 13                       | 14              |

Ct was determined by real-time PCR of cDNA using Qiagen SYBR Green Master Mix on a MJ Engine using Opticon4 software. Programme: 94°C for 15 minutes; 40 cycles of 94°C for 15 seconds, 60°C for 30 seconds, 72°C for 30 seconds with a plate-read at the end of each cycle. The melting curve was recorded to ensure that a single product was formed. For each biological replicate, duplicate reactions were performed. All primer pairs were carefully selected for specificity, linearity and efficiency over a 64- to 125-fold range of template concentrations prior to the analysis of gene expression. All primer pairs that did not amplify a single band of the expected size were discarded.

\*Expressed in ES cells.
