# Supplementary material
Source: PubMed Central journal article supplement (PMC2685939)

**A**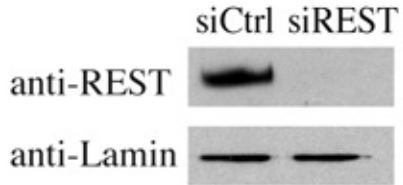**B**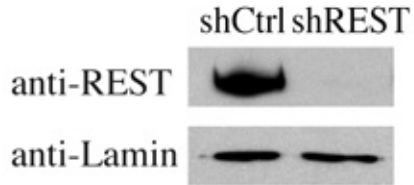

Supplement: supp_136_5_715__1.pdf [file supp_136_5_715__1.pdf]

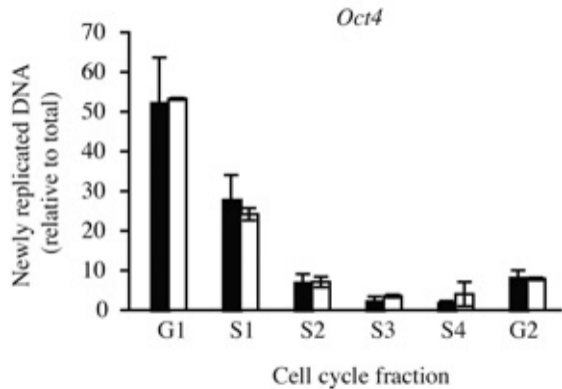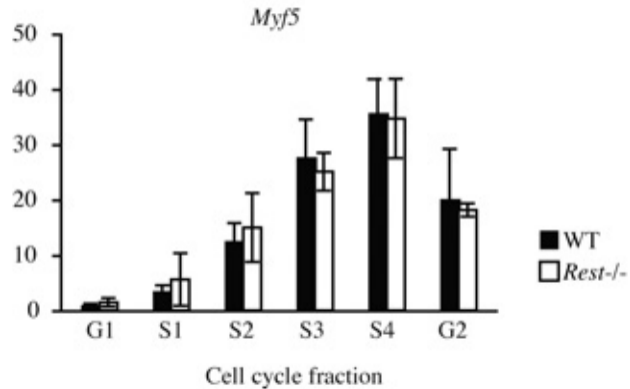

Supplement: supp_136_5_715__2.pdf [file supp_136_5_715__2.pdf]

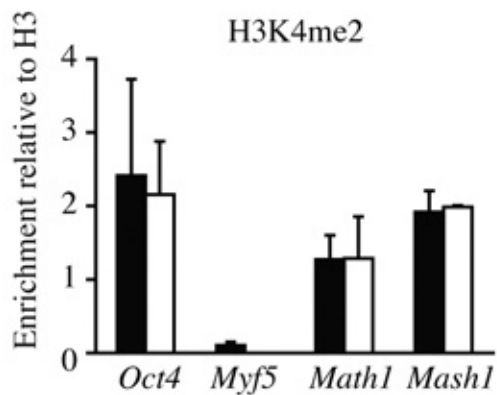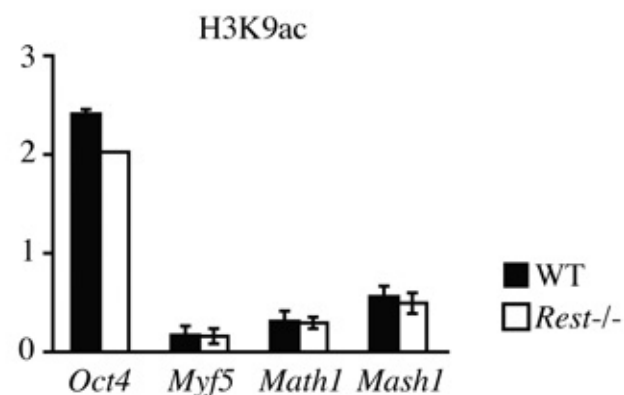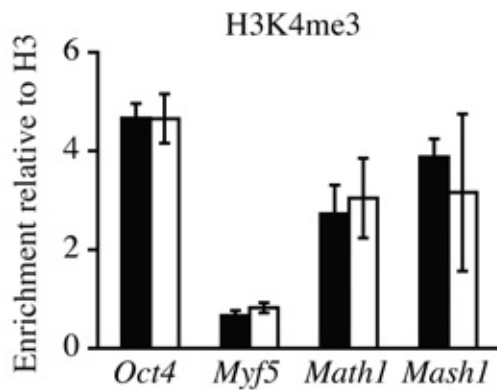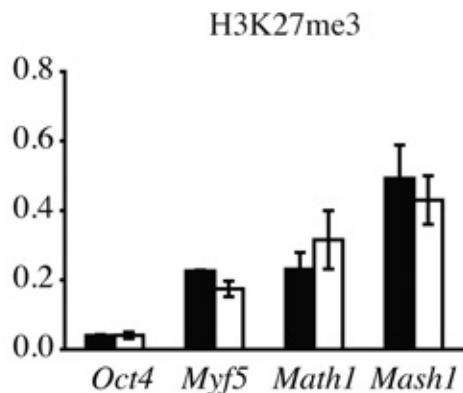

Supplement: supp_136_5_715__3.pdf [file supp_136_5_715__3.pdf]

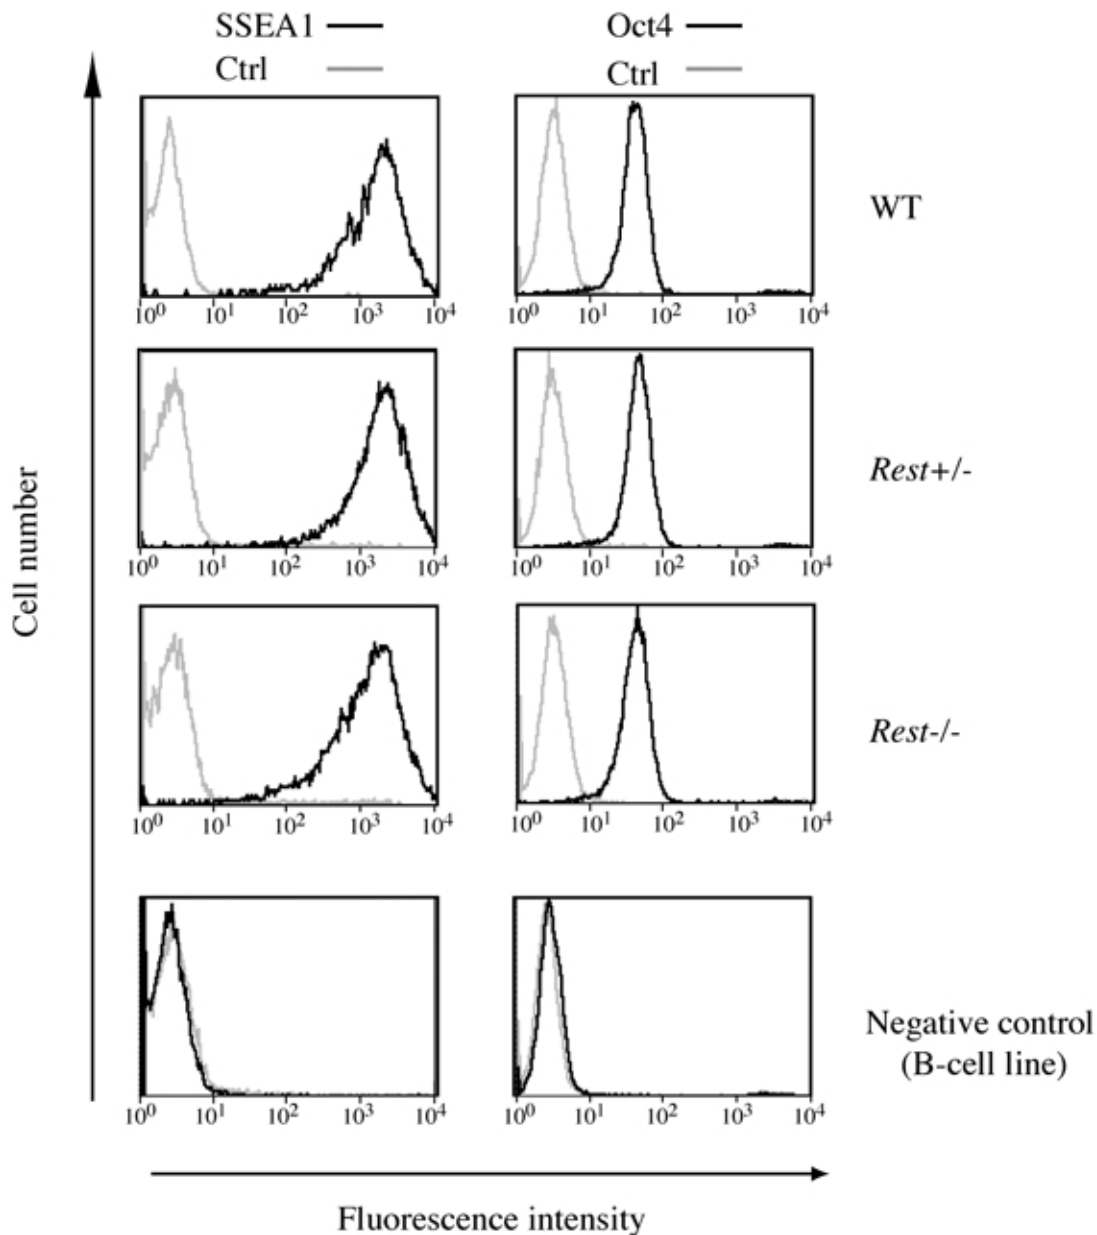

Supplement: supp_136_5_715__6.pdf [file supp_136_5_715__6.pdf]
